# Supplementary material for: Maternal consumption of green tea extract during pregnancy and lactation alters offspring's metabolism in rats
Source: PubMed Central journal article supplement (PMC6051583; doi:10.1371/journal.pone.0199969), 2018-07-18
Supplement: pone.0199969.s001.pdf [file pone.0199969.s001.pdf]

| Groups | Body weight evolution |       |       |        |        |        |        |        |        |                  |                      |       |       |       |       |       |       |       |
|--------|-----------------------|-------|-------|--------|--------|--------|--------|--------|--------|------------------|----------------------|-------|-------|-------|-------|-------|-------|-------|
|        | Body weight (g)       |       |       |        |        |        |        |        |        | Delta weight (g) | Body weight gain (g) |       |       |       |       |       |       |       |
|        | 0d                    | 7d    | 21d   | 1w     | 3w     | 5w     | 7w     | 9w     | 10w    |                  | 7d                   | 21d   | 1w    | 3w    | 5w    | 7w    | 9w    | 10w   |
| WCW    | 8.12                  | 15.28 | 46.43 | 118.18 | 202.75 | 284.3  | 354.11 | 395.34 | 406.8  | 398.68           | 7.16                 | 15.93 | 40.03 | 46.03 | 34.7  | 28.22 | 19.04 | 11.46 |
| WCW    | 6.96                  | 11.52 | 36.91 | 115.33 | 215.7  | 306.99 | 384.65 | 436.3  | 446.7  | 439.74           | 4.56                 | 15.11 | 45.31 | 48.77 | 40.52 | 34.84 | 22.1  | 10.4  |
| WCW    | 7.5                   | 15.7  | 57.44 | 142.96 | 251.32 | 344    | 408.2  | 447.2  | 460.55 | 453.05           | 8.2                  | 25.1  | 49.98 | 51.36 | 42.8  | 28.96 | 15.8  | 13.35 |
| WCW    | 8.68                  | 15.65 | 50.95 | 146.33 | 264.62 | 328.9  | 419.35 | 477.21 | 485.91 | 477.23           | 6.97                 | 18.64 | 39.26 | 60.04 | 25.2  | 26.53 | 20.91 | 8.7   |
| WCW    | 8.03                  | 14.87 | 49.41 | 133.24 | 240.27 | 300.1  | 397.96 | 447.47 | 458.61 | 450.58           | 6.84                 | 18.31 | 38.11 | 56.51 | 21.6  | 25.79 | 20.64 | 11.14 |
| WCW    | 9.9                   | 19.77 | 61.16 | 158.42 | 281.4  | 377.8  | 474.38 | 533.07 | 559.24 | 549.34           | 9.87                 | 25.13 | 49.05 | 64.72 | 52.2  | 31.61 | 18.74 | 26.17 |
| WCW    | 8.44                  | 16.46 | 59.5  | 149.93 | 271.83 | 364.5  | 458.38 | 516.02 | 534.95 | 526.51           | 8.02                 | 23.75 | 50.81 | 64    | 42.7  | 32.6  | 23.48 | 18.93 |
| WCW    | 6.43                  | 13.76 | 46.96 | 133.15 | 237.28 | 329.1  | 417.38 | 471.72 | 498    | 491.57           | 7.33                 | 17.82 | 50.17 | 51.32 | 46.8  | 29.92 | 19.05 | 26.28 |
| WCW    | 8.57                  | 17.03 | 62.67 | 116.14 | 240.29 | 362.7  | 476.72 | 558.88 | 593.4  | 584.83           | 8.46                 | 27.08 | 45.25 | 65.51 | 60    | 31.07 | 29.62 | 34.52 |
| GCW    | 8.37                  | 13.73 | 50.6  | 140.5  | 249.66 | 354.28 | 427.1  | 472.8  | 481.7  | 473.33           | 5.36                 | 19.87 | 52.32 | 56.7  | 45.25 | 33.15 | 20.6  | 8.9   |
| GCW    | 6.59                  | 13.3  | 44.95 | 149.38 | 252.27 | 317.3  | 383.33 | 417.42 | 430.7  | 424.11           | 6.71                 | 18.99 | 41.08 | 49.04 | 30.5  | 24.58 | 13.49 | 13.28 |
| GCW    | 7.46                  | 13.88 | 47.76 | 138.8  | 242.26 | 314.3  | 375.69 | 408.25 | 428.47 | 421.01           | 6.42                 | 20.7  | 46.62 | 45.24 | 38.7  | 29.91 | 12.46 | 20.22 |
| GCW    | 8.2                   | 15.8  | 45.15 | 146.45 | 262.85 | 333    | 415.44 | 468.15 | 501.06 | 492.86           | 7.6                  | 14.42 | 44.36 | 58.98 | 42.8  | 33.65 | 25.04 | 32.91 |
| GCW    | 6.48                  | 11.78 | 43.31 | 138.58 | 247.21 | 333.2  | 415.43 | 458.2  | 483.92 | 477.44           | 5.3                  | 16.82 | 47.06 | 56.43 | 45.1  | 32.23 | 20.78 | 25.72 |
| GCW    | 8.92                  | 19.73 | 64.15 | 157.57 | 270.23 | 363.4  | 445.61 | 504.8  | 530.66 | 521.74           | 10.81                | 0     | 52.47 | 52.08 | 43.9  | 28.1  | 23.01 | 25.86 |
| GCW    | 8.72                  | 17.2  | 54.69 | 129.15 | 228.01 | 311.7  | 379.61 | 414.13 | 430.26 | 421.54           | 8.48                 | 24.41 | 46.49 | 47.17 | 36    | 22.72 | 13.19 | 16.13 |
| GCW    | 7.53                  | 15.52 | 48.2  | 114.82 | 203.73 | 273.4  | 353.76 | 388.44 | 414.7  | 407.17           | 7.99                 | 21.59 | 38.8  | 44.9  | -6.2  | 28.47 | 10.36 | 26.26 |
| GCW    | 8.37                  | 16.32 | 48.13 | 109.46 | 212.21 | 295.5  | 379.62 | 429.15 | 459.11 | 450.74           | 7.95                 | 15.86 | 42.48 | 51.14 | 44.2  | 33.24 | 15.43 | 29.96 |
| GCW    | 7.26                  | 13    | 48.9  | 94.57  | 187.52 | 265.7  | 332.34 | 374.47 | 391.25 | 383.99           | 5.74                 | 19.53 | 33.43 | 44.07 | 37.4  | 23.52 | 23.63 | 16.78 |
| WHW    | 7.69                  | 14.22 | 52.67 | 129.07 | 203.56 | 290.81 | 360.76 | 402.65 | 420.1  | 412.41           | 6.53                 | 24.57 | 42.65 | 36.89 | 36.16 | 27.4  | 22.12 | 17.45 |
| WHW    | 8.11                  | 14.62 | 53.56 | 150.9  | 269.03 | 373.75 | 474.4  | 542.1  | 557.8  | 549.69           | 6.51                 | 20.5  | 54.77 | 58.22 | 39.86 | 50.9  | 34.9  | 15.7  |
| WHW    | 8.26                  | 13.43 | 43.65 | 117.42 | 219.76 | 309.5  | 395.37 | 445.1  | 469.8  | 461.54           | 5.17                 | 17.43 | 39.83 | 49.41 | 39.4  | 48.14 | 26.7  | 24.7  |
| WHW    | 7.4                   | 14.06 | 44.31 | 150.3  | 271.35 | 361.1  | 462.58 | 528.53 | 557.37 | 549.97           | 6.66                 | 16.76 | 44.1  | 62.27 | 44.3  | 35.11 | 24.1  | 28.84 |
| WHW    | 6.15                  | 11.15 | 39.78 | 114.33 | 206.5  | 264.3  | 345.51 | 407.28 | 432.35 | 426.2            | -6.15                | 16    | 36.94 | 44.01 | 23.7  | 35.73 | 23.69 | 25.07 |
| WHW    | 10.2                  | 20.28 | 63.92 | 146.75 | 247.01 | 326.6  | 412.18 | 465.27 | 495.65 | 485.45           | -10.2                | 25.71 | 42.17 | 48.49 | 38.8  | 29.7  | 23.68 | 30.38 |
| WHW    | 7.65                  | 14.83 | 54.47 | 142.69 | 267.63 | 365.5  | 468.33 | 517.77 | 554.01 | 546.36           | 7.18                 | 22.5  | 48.5  | 64.8  | 46.6  | 39.75 | 18.5  | 36.24 |
| WHW    | 6.42                  | 14.06 | 46.21 | 120.24 | 234.53 | 337.6  | 437.68 | 499.25 | 528.65 | 522.23           | 7.64                 | 17.22 | 43.06 | 58.34 | 55.9  | 32.83 | 24.28 | 29.4  |
| WHW    | 7.07                  | 14.51 | 54.22 | 80.39  | 189.97 | 282.8  | 393.46 | 474.13 | 510.54 | 503.47           | 7.44                 | 22.01 | 21.45 | 63.96 | 50.1  | 35.14 | 28.41 | 36.41 |
| GHW    | 8.03                  | 13.72 | 46.97 | 133.55 | 252.73 | 359.03 | 442.7  | 492    | 507.4  | 499.37           | 5.69                 | 17.67 | 50.12 | 61.38 | 42.93 | 46.02 | 24.7  | 15.4  |
| GHW    | 7.47                  | 15.28 | 50.84 | 165.35 | 286.05 | 360.7  | 437.22 | 478.43 | 500.5  | 493.03           | 7.81                 | 21.9  | 46.89 | 62.54 | 40.5  | 27.68 | 16.08 | 22.07 |
| GHW    | 6.54                  | 11.05 | 38.95 | 114.22 | 198.92 | 301.2  | 332.91 | 389.96 | 412.97 | 406.43           | 4.51                 | 17.11 | 39.05 | 42.19 | 76.6  | 28.85 | 26.99 | 23.01 |
| GHW    | 7.91                  | 14.65 | 47.98 | 150.35 | 269.32 | 351.4  | 453.37 | 517.36 | 553.59 | 545.68           | 6.74                 | 18.65 | 36.45 | 61.01 | 48.7  | 37.47 | 24.22 | 36.23 |
| GHW    | 5.98                  | 9.99  | 41.19 | 134.97 | 245.1  | 324.9  | 415.78 | 457.84 | 487.43 | 481.45           | 4.01                 | 16.84 | 36.61 | 61.69 | 44.4  | 33.53 | 13.84 | 29.59 |
| GHW    | 8.79                  | 18.29 | 62.41 | 152.09 | 262.72 | 335.9  | 416.06 | 472.48 | 496.05 | 487.26           | 9.5                  | 25.21 | 48.14 | 53.58 | 33.4  | 29.44 | 26.38 | 23.57 |
| GHW    | 8.56                  | 15.49 | 51.25 | 129.15 | 233.6  | 322.5  | 402.46 | 450.03 | 475.53 | 466.97           | 6.93                 | 22.31 | 47.7  | 56.79 | 39.6  | 24.7  | 19.47 | 25.5  |
| GHW    | 7,34                  | 13,82 | 50,7  | 118,48 | 229,92 | 319,7  | 414,47 | 472,3  | 492,49 | 485,15           | 6,48                 | 20,96 | 44,17 | 59,05 | 43,3  | 36,46 | 18,24 | 20,19 |
| GHW    | 8,24                  | 15,55 | 42,84 | 99,13  | 187,33 | 273,6  | 359,93 | 407,14 | 448,55 | 440,31           | 7,31                 | 14,71 | 40,7  | 44,2  | 45,8  | 35,39 | 17,27 | 41,41 |
| GHW    | 7,28                  | 15,06 | 49,58 | 103,73 | 206,48 | 294,4  | 383,5  | 441,94 | 473,01 | 465,73           | 7,78                 | 19,72 | 40,99 | 52,56 | 47,9  | 31,72 | 23,07 | 31,07 |
