# Supplementary material for: Maternal consumption of green tea extract during pregnancy and lactation alters offspring's metabolism in rats
Source: PubMed Central journal article supplement (PMC6051583; doi:10.1371/journal.pone.0199969), 2018-07-18
Supplement: pone.0199969.s002.pdf [file pone.0199969.s002.pdf]

| Groups | Serum analyses      |                         |                         |                  |                 |                     |                |             |                 |         |
|--------|---------------------|-------------------------|-------------------------|------------------|-----------------|---------------------|----------------|-------------|-----------------|---------|
|        | Cholesterol (mg/dL) | HDL-cholesterol (mg/dL) | Triacylglycerol (mg/dL) | Glycemia (mg/dL) | Insulin (ng/mL) | Adiponectin (µg/mL) | Leptin (ng/mL) | LPS (EU/mL) | Adiponectin/SAT | HOMA-IR |
| WCW    | 71.6                | 31.02                   | 126.03                  | 103              | 0.933           | 1.834               | 5.285          | 11.46       | 0.13            | 5.685   |
| WCW    | 91.72               | 26.93                   | 233.88                  | 119              | 1.926           | 1.49                | 11.638         | 10.96       | 0.06            | 13.56   |
| WCW    | 78.99               | 54.64                   | 294.63                  | 124              | 0.492           | 1.566               |                | 10.92       | 0.06            | 3.612   |
| WCW    | 65                  | 34                      | 139.22                  | 108              | 1.105           | 1.5                 | 8.127          | 10.847      | 0.06            | 7.058   |
| WCW    | 69                  | 34                      | 173.01                  | 105              | 2.871           | 2.102               | 9.128          | 8.736       | 0.08            | 17.832  |
| WCW    | 76                  | 31                      | 300.13                  | 114              | 5.293           | 1.65                | 21.168         | 7.28        | 0.03            | 35.691  |
| WCW    | 71                  | 37                      | 210.34                  | 102              | 5.739           | 2.156               | 16.954         | 7.899       | 0.05            | 34.626  |
| WCW    | 82                  | 36                      | 375.28                  |                  | 5.797           |                     | 5.378          | 17.218      |                 |         |
| WCW    | 72                  | 35                      | 281.46                  |                  | 1.13            |                     | 33.104         | 5.387       |                 |         |
| GCW    | 79.29               | 32.68                   | 257.85                  | 125              | 3.324           | 1.676               | 19.384         | 10.07       | 0.05            | 24.579  |
| GCW    | 80                  | 37                      | 294.07                  | 108              | 6.122           | 1.796               | 17.667         | 7.5         | 0.06            | 39.113  |
| GCW    | 73                  | 40                      | 174.02                  |                  | 1.966           | 1.62                | 7.129          | 6.84        | 0.08            |         |
| GCW    | 86                  | 56                      | 178.06                  |                  | 3.752           | 2.502               | 11.86          | 6.84        | 0.08            |         |
| GCW    | 70                  | 37                      | 250.69                  | 112              | 3.704           | 1.518               | 13.553         | 6.479       | 0.05            | 24.539  |
| GCW    | 90                  | 58                      | 278.44                  | 85               | 5.906           | 2.336               | 17.57          | 5.46        | 0.05            | 29.694  |
| GCW    | 66                  | 41                      | 130.64                  | 97               | 0.373           | 1.45                | 4.929          | 7.389       | 0.08            | 2.14    |
| GCW    | 72                  | 49                      | 169.48                  | 100              |                 |                     | 12.173         |             |                 |         |
| GCW    | 82                  | 49                      | 208.32                  | 88               |                 |                     | 15.435         |             |                 |         |
| GCW    | 71                  | 41                      | 153.34                  |                  |                 |                     | 3.991          |             |                 |         |
| WHW    | 66.27               | 31.63                   | 92.98                   | 116              | 2.459           | 1.844               | 14.623         | 9.07        | 0.07            | 16.873  |
| WHW    | 100.59              | 31.02                   | 126.45                  | 125              | 3.464           | 1.54                | 22.583         | 9.44        | 0.03            | 25.613  |
| WHW    | 131.36              | 30.59                   | 91.32                   | 120              | 0.871           | 1.722               |                | 9.87        | 0.09            | 6.18    |
| WHW    | 71                  | 46                      | 193.19                  | 112              | 8.217           | 1.684               | 32.962         | 12.376      | 0.04            | 54.437  |
| WHW    | 74                  | 36                      | 176.54                  | 109              | 4.796           | 2.118               | 20.683         | 6.625       | 0.07            | 30.924  |
| WHW    | 76                  | 44                      | 249.18                  | 112              | 5.272           | 1.96                | 25.143         | 4.951       | 0.04            | 34.928  |
| WHW    | 103                 | 46                      | 205.3                   | 115              | 8.651           | 1.896               | 29.404         | 6.043       | 0.04            | 58.851  |
| WHW    | 74                  | 31                      | 300.13                  |                  | 6.902           |                     | 31.585         | 6.771       |                 |         |
| WHW    | 61                  | 34                      | 143.76                  |                  | 0.703           |                     | 22.645         | 4.878       |                 |         |
| GHW    | 61.83               | 25.19                   | 146.28                  | 135              | 4.129           | 1.89                | 27.522         | 11.7        | 0.05            | 32.969  |
| GHW    | 56                  | 25                      | 133.67                  | 130              | 6.734           | 1.418               | 19.281         | 8.117       | 0.03            | 51.78   |
| GHW    | 77                  | 41                      | 197.23                  |                  | 2.375           | 1.676               | 20.262         | 10.374      | 0.05            |         |
| GHW    | 62                  | 32                      | 131.65                  |                  | 2.098           | 1.356               | 24.859         | 5.242       | 0.03            |         |
| GHW    | 68                  | 38                      | 144.26                  | 117              | 3.416           | 1.414               | 15.916         | 10.556      | 0.04            | 23.64   |
| GHW    | 63                  | 34                      | 131.15                  | 112              | 5.468           | 1.25                | 13.219         | 8.773       | 0.04            | 36.228  |
| GHW    | 72                  | 41                      | 133.17                  | 103              | 4.198           | 2.694               | 17.785         | 9.501       | 0.08            | 25.578  |
| GHW    | 74                  | 40                      | 170.49                  | 121              |                 |                     | 27,793         |             |                 |         |
| GHW    | 70                  | 34                      | 119.55                  | 133              |                 |                     | 17,825         |             |                 |         |
| GHW    | 66                  | 34                      | 145.78                  |                  |                 |                     | 16,802         |             |                 |         |
