# Supplementary material for: Maternal consumption of green tea extract during pregnancy and lactation alters offspring's metabolism in rats
Source: PubMed Central journal article supplement (PMC6051583; doi:10.1371/journal.pone.0199969), 2018-07-18
Supplement: pone.0199969.s003.pdf [file pone.0199969.s003.pdf]

| Groups | OGTT                       |     |     |     |     |      |                       |
|--------|----------------------------|-----|-----|-----|-----|------|-----------------------|
|        | Glycemia (mg/dL) - minutes |     |     |     |     |      | AUC x 10 <sup>3</sup> |
|        | 0'                         | 15' | 30' | 60' | 90' | 120' |                       |
| WCW    | 103                        | 243 | 189 | 138 | 114 | 105  | 17805                 |
| WCW    | 119                        | 173 | 143 | 136 | 133 | 120  | 16575                 |
| WCW    | 124                        | 210 | 188 | 162 | 165 | 148  | 20340                 |
| WCW    | 108                        | 168 | 169 | 142 | 149 | 137  | 17917.5               |
| WCW    | 105                        | 149 | 160 | 136 | 132 | 117  | 16417.5               |
| WCW    | 114                        | 157 | 161 | 143 | 123 | 112  | 16492.5               |
| WCW    | 102                        | 138 | 147 | 120 | 116 | 109  | 14857.5               |
| WCW    |                            |     |     |     |     |      |                       |
| WCW    |                            |     |     |     |     |      |                       |
| GCW    | 125                        | 238 | 169 | 161 | 151 | 113  | 19365                 |
| GCW    | 108                        | 146 | 160 | 132 | 145 | 123  | 16755                 |
| GCW    |                            |     |     |     |     |      |                       |
| GCW    |                            |     |     |     |     |      |                       |
| GCW    | 112                        | 170 | 158 | 139 | 114 | 102  | 16065                 |
| GCW    | 85                         | 125 | 125 | 117 | 116 | 106  | 13905                 |
| GCW    | 97                         | 174 | 172 | 146 | 117 | 104  | 16657.5               |
| GCW    | 100                        | 155 | 116 | 112 | 96  | 90   | 13275                 |
| GCW    | 88                         | 168 | 183 | 142 | 157 | 126  | 18157.5               |
| GCW    |                            |     |     |     |     |      |                       |
| WHW    | 116                        | 182 | 167 | 150 | 143 | 139  | 18232.5               |
| WHW    | 125                        | 193 | 285 | 169 | 170 | 153  | 22710                 |
| WHW    | 120                        | 188 | 164 | 142 | 143 | 125  | 17835                 |
| WHW    | 112                        | 228 | 206 | 197 | 137 | 105  | 20490                 |
| WHW    | 109                        | 173 | 203 | 165 | 155 | 147  | 19785                 |
| WHW    | 112                        | 152 | 166 | 151 | 143 | 133  | 17670                 |
| WHW    | 115                        | 200 | 198 | 143 | 144 | 139  | 19012.5               |
| WHW    |                            |     |     |     |     |      |                       |
| WHW    |                            |     |     |     |     |      |                       |
| GHW    | 135                        | 199 | 190 | 191 | 175 | 148  | 21472.5               |
| GHW    | 130                        | 191 | 189 | 150 | 155 | 139  | 19327.5               |
| GHW    |                            |     |     |     |     |      |                       |
| GHW    |                            |     |     |     |     |      |                       |
| GHW    | 117                        | 175 | 139 | 119 | 120 | 111  | 15465                 |
| GHW    | 112                        | 165 | 159 | 144 | 119 | 102  | 16312.5               |
| GHW    | 103                        | 128 | 128 | 114 | 114 | 110  | 14062.5               |
| GHW    | 121                        | 136 | 189 | 134 | 127 | 95   | 16455                 |
| GHW    | 133                        | 172 | 176 | 149 | 144 | 146  | 18517.5               |
| GHW    |                            |     |     |     |     |      |                       |
