# Supplementary material for: Maternal consumption of green tea extract during pregnancy and lactation alters offspring's metabolism in rats
Source: PubMed Central journal article supplement (PMC6051583; doi:10.1371/journal.pone.0199969), 2018-07-18
Supplement: pone.0199969.s004.pdf [file pone.0199969.s004.pdf]

| Groups | Relative tissue weight      |       |       |       |       |       |
|--------|-----------------------------|-------|-------|-------|-------|-------|
|        | (g tissue/100g body weight) |       |       |       |       |       |
|        | RET                         | GON   | MES   | LIVER | GAST  | SAT   |
| WCW    | 2.31                        | 1.003 | 0.849 | 3.275 | 0.862 | 3.349 |
| WCW    | 2.509                       | 1.918 | 1.077 | 4.294 | 0.865 | 5.505 |
| WCW    | 2.58                        | 2.37  | 0.92  | 3.45  | 0.72  | 5.87  |
| WCW    | 2.37                        | 1.46  | 1.24  | 3.19  | 1.88  | 5.07  |
| WCW    | 2.21                        | 2.32  | 0.94  | 2.55  | 0.87  | 5.48  |
| WCW    | 4.77                        | 3.7   | 1.75  | 3.13  | 0.73  | 10.23 |
| WCW    | 3.55                        | 3.22  | 1.48  | 2.82  | 0.8   | 8.24  |
| WCW    | 4.73                        | 2.44  | 1.48  | 3.81  | 0.69  | 8.65  |
| WCW    | 3.55                        | 3.81  | 1.64  | 3.01  | 0.69  | 9.01  |
| GCW    | 3.52                        | 2.52  | 1.26  | 3.36  | 0.86  | 7.3   |
| GCW    | 3.32                        | 2.77  | 1.24  | 3.61  | 0.79  | 7.33  |
| GCW    | 2.25                        | 1.71  | 0.98  | 3.22  | 0.9   | 4.95  |
| GCW    | 3.08                        | 1.97  | 1.42  | 3.19  | 0.86  | 6.48  |
| GCW    | 2.45                        | 2.46  | 1.12  | 3.78  | 0.72  | 6.04  |
| GCW    | 4.17                        | 3.07  | 1.25  | 3.02  | 0.73  | 8.49  |
| GCW    | 1.91                        | 1.58  | 0.55  | 3.12  | 0.98  | 4.04  |
| GCW    | 3.02                        | 2.09  | 1.04  | 2.85  | 0.81  | 6.15  |
| GCW    | 2.27                        | 2.89  | 1.07  | 3.1   | 0.83  | 6.23  |
| GCW    | 1.62                        | 1.71  | 0.79  | 2.75  | 0.93  | 4.12  |
| WHW    | 2.31                        | 1.95  | 1.11  | 3.21  | 0.81  | 5.38  |
| WHW    | 3.62                        | 3.3   | 1.52  | 3.14  | 0.87  | 8.44  |
| WHW    | 2.28                        | 1.6   | 0.9   | 3.02  | 0.9   | 4.79  |
| WHW    | 2.51                        | 2.87  | 1.55  | 3.36  | 0.72  | 6.93  |
| WHW    | 3.31                        | 2.8   | 1.35  | 3.53  | 0.79  | 7.45  |
| WHW    | 4.39                        | 3.13  | 1.88  | 3.2   | 0.81  | 9.39  |
| WHW    | 3.44                        | 3.04  | 1.95  | 3.03  | 0.68  | 8.42  |
| WHW    | 4.31                        | 3.29  | 2.13  | 3.51  | 0.7   | 9.73  |
| WHW    | 3.2                         | 3.56  | 1.98  | 3.27  | 0.77  | 8.74  |
| GHW    | 3.5                         | 2.64  | 1.48  | 3.12  | 0.75  | 7.62  |
| GHW    | 3.53                        | 3.83  | 1.46  | 3.55  | 0.81  | 8.82  |
| GHW    | 3.84                        | 2.64  | 1.56  | 2.87  | 0.83  | 8.04  |
| GHW    | 3.4                         | 2.7   | 1.68  | 2.71  | 0.8   | 7.78  |
| GHW    | 3.42                        | 3.02  | 1.22  | 3.13  | 0.8   | 7.66  |
| GHW    | 2.44                        | 3     | 1.23  | 3.15  | 0.87  | 6.67  |
| GHW    | 3.88                        | 1.95  | 1.47  | 2.79  | 0.87  | 7.3   |
| GHW    | 3.27                        | 3.42  | 1.62  | 3.24  | 0.82  | 8.32  |
| GHW    | 3.69                        | 2.19  | 1.38  | 2.46  | 0.9   | 7.26  |
| GHW    | 3.01                        | 3.42  | 2.15  | 2.74  | 0.8   | 8.58  |
