# Supplementary material for: Maternal consumption of green tea extract during pregnancy and lactation alters offspring's metabolism in rats
Source: PubMed Central journal article supplement (PMC6051583; doi:10.1371/journal.pone.0199969), 2018-07-18
Supplement: pone.0199969.s007.pdf [file pone.0199969.s007.pdf]

| Groups | Quantification of inflammatory proteins |                                   |                                     |
|--------|-----------------------------------------|-----------------------------------|-------------------------------------|
|        | p-NF-kB p50 in GON (% of control)       | p-NF-kB p50 in MES (% of control) | p-NF-kB p50 in LIVER (% of control) |
| WCW    | 67.561                                  | 41.687                            | 101.779                             |
| WCW    | 80.918                                  | 167.393                           | 96.099                              |
| WCW    | 62.131                                  | 49.375                            | 102.121                             |
| WCW    | 189.39                                  | 141.545                           | 134.464                             |
| WCW    | 52.03                                   | 50.956                            | 83.234                              |
| WCW    | 156.72                                  | 127.169                           |                                     |
| WCW    | 91.25                                   | 121.875                           | 82.302                              |
| WCW    |                                         |                                   |                                     |
| WCW    |                                         |                                   |                                     |
| GCW    | 94.838                                  | 71.242                            | 111.036                             |
| GCW    | 104.851                                 | 58.225                            | 105.607                             |
| GCW    | 137.9                                   | 61.057                            | 104.802                             |
| GCW    | 118.271                                 | 69.854                            | 81.152                              |
| GCW    | 117.494                                 | 63.386                            | 77.372                              |
| GCW    | 68.666                                  | 56.622                            | 74.977                              |
| GCW    |                                         |                                   |                                     |
| GCW    | 185.465                                 | 20.814                            |                                     |
| GCW    |                                         |                                   |                                     |
| GCW    |                                         |                                   |                                     |
| WHW    | 91.626                                  | 70.064                            | 112.574                             |
| WHW    | 129.38                                  | 70.018                            | 104.538                             |
| WHW    | 132.861                                 | 66.168                            | 86.335                              |
| WHW    | 210.124                                 | 39.98                             | 109.529                             |
| WHW    | 62.285                                  | 79.37                             | 101.508                             |
| WHW    | 284.202                                 | 77.547                            |                                     |
| WHW    | 136.641                                 | 70.338                            | 68.453                              |
| WHW    |                                         |                                   |                                     |
| WHW    |                                         |                                   |                                     |
| GHW    | 110.417                                 | 111.758                           | 99.114                              |
| GHW    | 62.279                                  | 106.95                            | 101.271                             |
| GHW    | 46.815                                  | 114.904                           | 111.572                             |
| GHW    | 112.316                                 | 67.684                            | 86.628                              |
| GHW    | 149.635                                 | 86.144                            | 107.053                             |
| GHW    | 142.844                                 | 51.496                            | 65.029                              |
| GHW    |                                         |                                   |                                     |
| GHW    | 95.333                                  | 44.867                            |                                     |
| GHW    |                                         |                                   |                                     |
| GHW    |                                         |                                   |                                     |
